# Supplementary material for: Evolutionary analysis of the Chikungunya virus epidemic in Mexico reveals intra-host mutational hotspots in the E1 protein
Source: PubMed Central journal article supplement (PMC6294367; doi:10.1371/journal.pone.0209292), 2018-12-14
Supplement: pone.0209292.s002.pdf [file pone.0209292.s002.pdf]

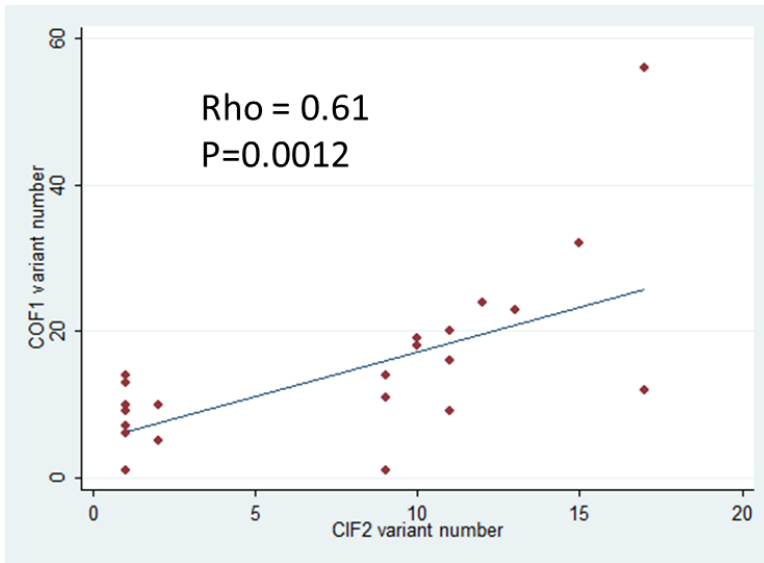

**S2 Fig. Correlation between the number of haplotype variants in two E1 amplicons.**

Pearson's correlation analysis between the number of variant haplotypes in each patient in amplicon COF1 and CIF2.
