# Supplementary material for: Evolutionary analysis of the Chikungunya virus epidemic in Mexico reveals intra-host mutational hotspots in the E1 protein
Source: PubMed Central journal article supplement (PMC6294367; doi:10.1371/journal.pone.0209292), 2018-12-14
Supplement: pone.0209292.s003.pdf [file pone.0209292.s003.pdf]

**S1 Table. Patient characteristics included in national passive CHIKV surveillance**

| <b>Parameter</b>            | <b>N (total 5266)</b> | <b>RT-qPCR CHIKV Positive</b> | <b>RT-qPCR-CHIKV Negative</b> | <b>P value<sup>a</sup></b> |
|-----------------------------|-----------------------|-------------------------------|-------------------------------|----------------------------|
| <b>Age<sup>b</sup></b>      |                       |                               |                               |                            |
| ≤ 17                        | 802                   | 454                           | 348                           | < 0.0001                   |
| 18-29                       | 1218                  | 586                           | 632                           |                            |
| 30-39                       | 1124                  | 546                           | 578                           |                            |
| 40-49                       | 862                   | 443                           | 419                           |                            |
| 50-59                       | 574                   | 311                           | 263                           |                            |
| >60                         | 446                   | 278                           | 168                           |                            |
| <b>Gender<sup>c</sup></b>   |                       |                               |                               |                            |
| Female                      | 3271                  | 1679                          | 1592                          | NS                         |
| Male                        | 1968                  | 1046                          | 922                           |                            |
| <b>Location<sup>d</sup></b> |                       |                               |                               |                            |
| South                       | 4041                  | 2082                          | 1959                          | <0.0001                    |
| Centre                      | 889                   | 516                           | 373                           |                            |
| North                       | 147                   | 59                            | 88                            |                            |

<sup>a</sup>Chi Square Test of dependency between being CHIKV positive and age, gender and location

<sup>b</sup>N=5026 included in the analysis as 240 patients had missing data

<sup>c</sup>N=5239 included in the analysis as 27 patients had missing data

<sup>d</sup>N=5077 included in the analysis as 189 patients had missing data
