# Supplementary material for: Evolutionary analysis of the Chikungunya virus epidemic in Mexico reveals intra-host mutational hotspots in the E1 protein
Source: PubMed Central journal article supplement (PMC6294367; doi:10.1371/journal.pone.0209292), 2018-12-14
Supplement: pone.0209292.s008.pdf [file pone.0209292.s008.pdf]

### S6. Demographic and clinical characteristics of 25 sequencing samples

| Parameter               | Number | Frecuency (%) |
|-------------------------|--------|---------------|
| <b>Gender</b>           |        |               |
| Female                  | 12     | 48            |
| Male                    | 13     | 52            |
| <b>Location</b>         |        |               |
| South                   | 19     | 76            |
| Centre                  | 6      | 24            |
| North                   | 0      | 0             |
| <b>Symptoms</b>         |        |               |
| Fever                   | 25     | 100           |
| Myalgia                 | 24     | 92            |
| Arthralgias             | 24     | 92            |
| Headache                | 20     | 80            |
| Chill                   | 20     | 80            |
| Arthritis               | 19     | 76            |
| Retro-ocular pain       | 15     | 60            |
| Exanthema               | 7      | 28            |
| Abdominal pain          | 5      | 20            |
| Fatigue                 | 3      | 12            |
| Conjunctivitis          | 2      | 8             |
| Splenomegaly            | 2      | 8             |
| Threw up                | 2      | 8             |
| Diarrhea                | 2      | 8             |
| Cough                   | 1      | 4             |
| Jaundice                | 1      | 4             |
| Hepatomegaly            | 1      | 4             |
| Decreased visual acuity | 1      | 4             |
| Hemorrhage              | 1      | 4             |
